# Supplementary material for: Timing of CGM initiation in pediatric diabetes: The CGM TIME Trial
Source: PubMed Central journal article supplement — Pediatr Diabetes. 2020 Nov 4;22(2):279–87. doi: 10.1111/pedi.13144 (PMC7984035; doi:10.1111/pedi.13144), 2020-11-04
Supplement: PEDI-22-279-s001.pdf [file PEDI-22-279-s001.pdf]

## Supporting Information

**Figure 1:** CGM TIME Trial CONSORT Flow Diagram

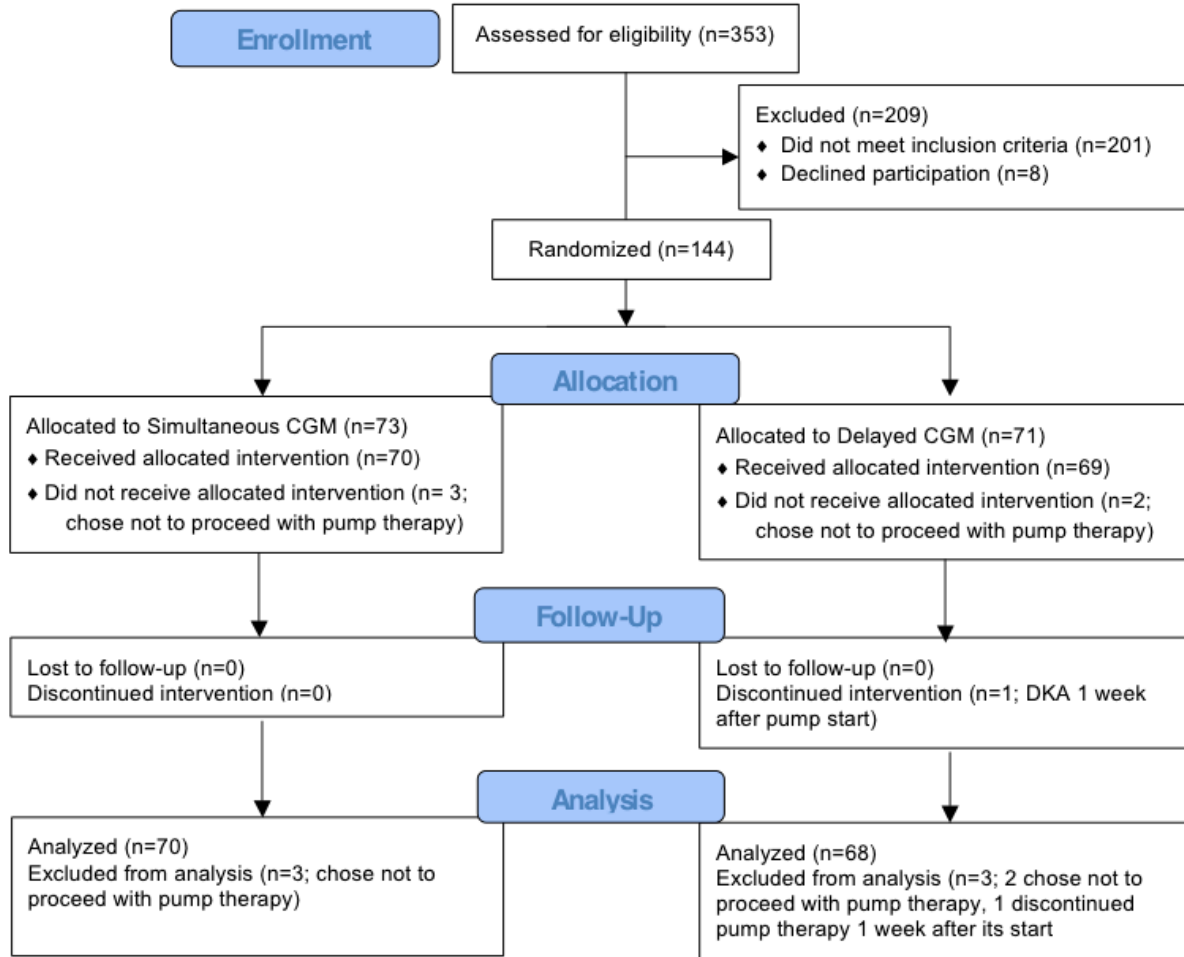

**Table 1:** Association between CGM adherence hours and HbA1c at 6 months after CGM initiation as determined by ordinary least squares regression, adjusted for baseline HbA1c, age group, gender, ethnicity, history of severe hypoglycemia and site, with Site 1 as reference given it had the largest sample size.

| Parameter                                                      | Coefficient | SE   | 95% Confidence Interval | t     | P      |
|----------------------------------------------------------------|-------------|------|-------------------------|-------|--------|
| Baseline HbA1c                                                 | 0.47        | 0.06 | 0.34 to 0.59            | 7.46  | <0.001 |
| Age Group (13-18)                                              | 0.09        | 0.12 | -0.14 to 0.33           | 0.78  | 0.439  |
| Gender (Female)                                                | 0.21        | 0.12 | -0.02 to 0.44           | 1.81  | 0.072  |
| Site 2                                                         | 0.17        | 0.18 | -0.17 to 0.52           | 0.98  | 0.330  |
| Site 3                                                         | 0.16        | 0.18 | -0.19 to 0.51           | 0.90  | 0.368  |
| Site 4                                                         | 0.27        | 0.19 | -0.10 to 0.63           | 1.44  | 0.153  |
| Site 5                                                         | -0.39       | 0.18 | -0.74 to -0.04          | -2.18 | 0.031  |
| Average CGM hours/100                                          | -0.38       | 0.15 | -0.68 to -0.09          | -2.53 | 0.013  |
| Average CGM hours/100 ^2                                       | 0.03        | 0.02 | -0.01 to 0.07           | 1.37  | 0.172  |
| Ethnicity (Caucasian)                                          | -0.16       | 0.18 | -0.51 to 0.18           | -0.92 | 0.36   |
| History of Severe Hypoglycemia in 12 months Before Study Entry | 0.12        | 0.19 | -0.25 to 0.49           | 0.63  | 0.528  |

Model LR;  $X^2 = 90.49$  (df=11),  $P < 0.001$ ;  $R^2 = 0.49$ ,  $N=134$

**Figure 2 A&B:** Association Between Area Under the Curve (AUC) for time spent in Hypoglycemia and Hyperglycemia, as determined by ordinary least squares regression with cluster adjustment. The x-axis in the figures represents the mean CGM hours per 28-day period between CGM initiation and 6 months later.

**AUC for Hypoglycemia (BG <3.9 mmol/L):**

| Factor     | F    | d.f. | P      |
|------------|------|------|--------|
| CGM hours  | 1.66 | 2    | 0.192  |
| Nonlinear  | 0.00 | 1    | 1.000  |
| Ages 13-18 | 1.88 | 1    | 0.170  |
| Female     | 2.01 | 1    | 0.157  |
| Site       | 5.60 | 4    | <0.001 |
| REGRESSION | 3.47 | 8    | <0.001 |

$R^2 = 0.10, n = 741$

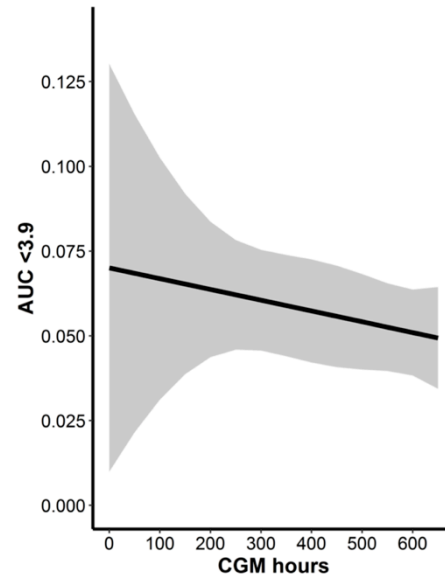

**AUC for Hyperglycemia (BG >10 mmol/L):**

| Factor     | F     | d.f. | P      |
|------------|-------|------|--------|
| CGM hours  | 13.94 | 2    | <0.001 |
| Nonlinear  | 0.13  | 1    | 0.720  |
| Ages 13-18 | 0.04  | 1    | 0.834  |
| Female     | 0.08  | 1    | 0.773  |
| Site       | 4.01  | 4    | 0.003  |
| REGRESSION | 7.54  | 8    | <0.001 |

$R^2 = 0.18, n = 741$

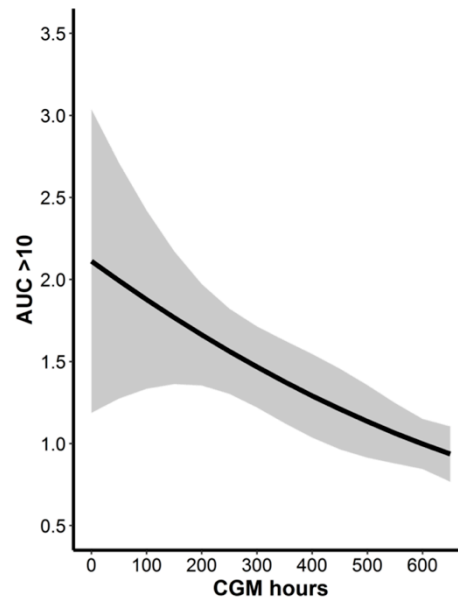

**List of CGM TIME Trial Study Group Members:**

Personnel are listed as (PI) for Principal Investigator, (I) for Co-Investigator, (C) for Co-ordinators, (DNE) for Diabetes Nurse Educators, (RD) for Dieticians. Children's Hospital of Eastern Ontario: Margaret L. Lawson (PI), Brenda Bradley (Project Manager), Christine Richardson (DNE), Jennilea Courtney (C), Tammy Cooper (RD). McMaster Children's Hospital: Karen McAssey (I), Janice Muileboom (DNE), Anne Marie DiGravio (RD), Elizabeth Helden (C), Amiee Hill (C). Children's Hospital, London Health Sciences Centre: Cheril Clarson (I), Chantelle Black (DNE), Ruth Duncan (DNE), Keira Evans (C), Jenna MacIsaac (RD), Margaret Watson (C). Markham-Stouffville Hospital: Susan E. Kirsch (I), Alanna Landry (DNE), Marilyn Fry (RD), Sameer Datwani (C), Lindsay Meldrum (C). Hospital for Sick Children: Farid H. Mahmud (I), Jacqueline R. Curtis (I), Lynne Cormack (DNE), Kamaljeet Sahota (C), Vanita Pais (RD). Biostatistics: Jason Chan MSc and Ken Tang PhD, CHEO Research Institute. Coordinating Center: Robarts Clinical Trial: Cynthia J. Downie, Liz Liddiard, Dildeep Kaur, Melody Chow, Helen Sun. Biostatisticians: Gopalan Rajamannar PhD, Robarts Clinical Trials; Nicholas Barrowman PhD, CHEO Research Institute. JDRF Canadian Clinical Trial Network: Olivia Lou, Concepcion Nierras. Data Safety Monitoring Board: Heather J. Dean (Chair), William V. Tamborlane, Howard A. Wolpert.
